# Supplementary material for: Mutually immiscible ionic liquids
Source: Royal Society of Chemistry journal article supplement (doi:10.1039/b604595b), 2006-01-01
Supplement: b604595b_b.pdf [file b604595b_b.pdf]

### Supplementary Data

Below is additional information on how the enthalpy and entropy values were obtained. The mol % of [Rmim]Cl in [C<sub>66614</sub>P]Cl (upper phase) and the concentration of [Rmim]Cl in the lower phase (approximates to the molar volume of [Rmim]Cl since it is composed of > 98 % [Rmim]Cl) were converted to mol / litre values and the temperature, in deg. C was converted into deg. K. These values were used to create the Van't Hoff plot in Figure 2. The Table 1 data were in turn derived from the equation of the straight lines in Figure 2.

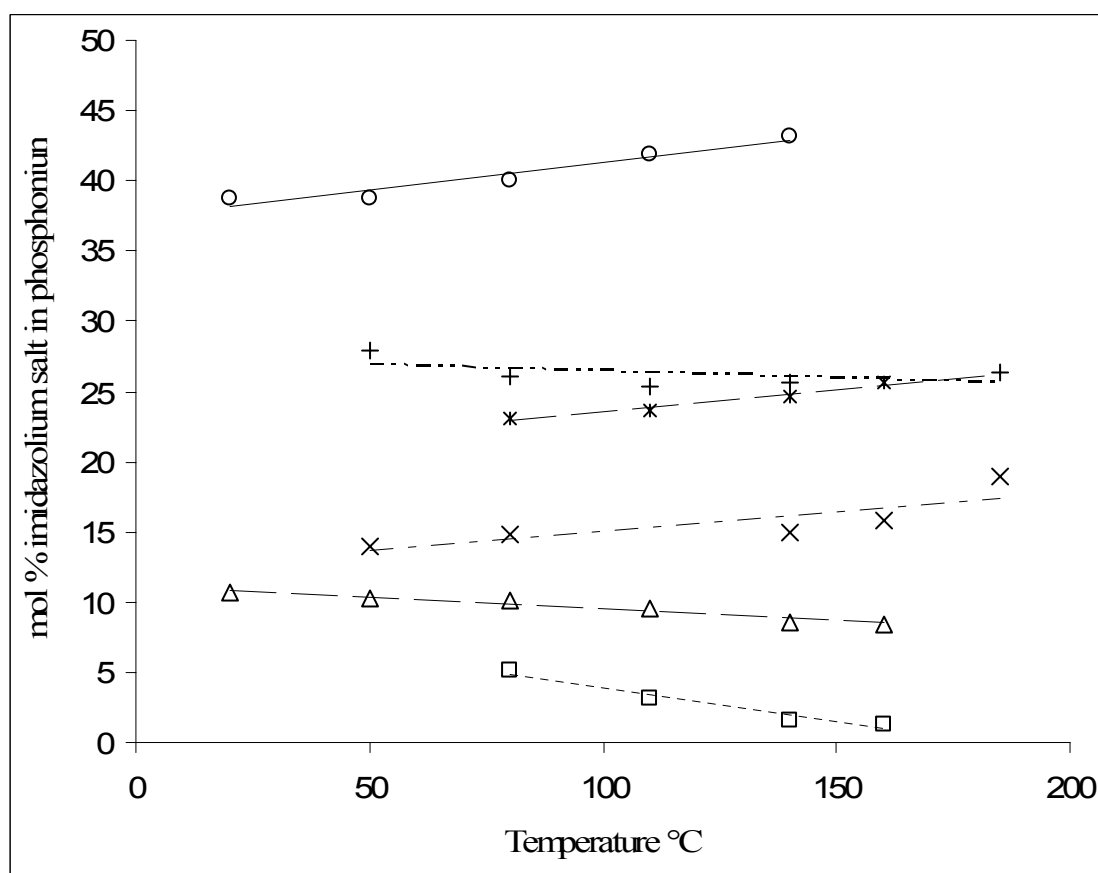

**Figure 1.** Concentration of 1-alkyl-3-methylimidazolium chlorides in the phosphonium rich phase. This was determined directly by NMR. From top to bottom, the lines represent [C<sub>5</sub>mim]Cl - o; [s-C<sub>4</sub>mim]Cl - +; [C<sub>4</sub>mim]Cl - \*; [C<sub>3</sub>mim]Cl - x; [C<sub>2</sub>mim]Cl - Δ; and [C<sub>1</sub>mim]Cl - □.

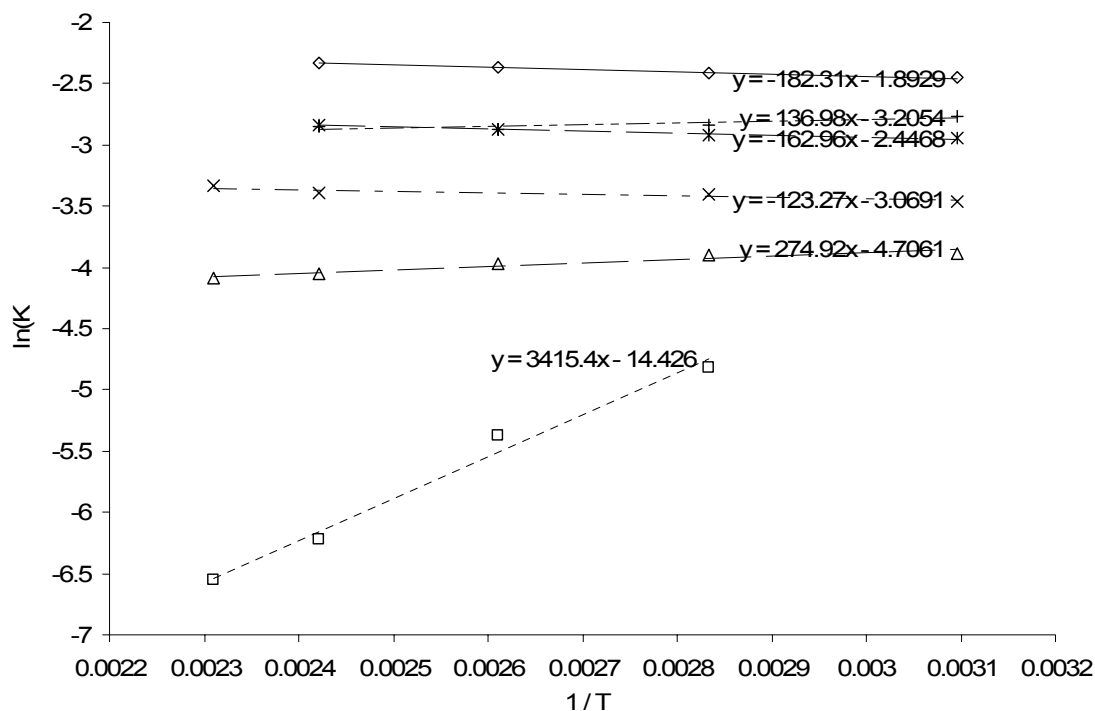

**Figure 2.** Van't Hoff plot of data derived from Figure 1. Gradient =  $-\Delta H / R$  and Intercept =  $\Delta S / R$ , where  $R$  = Universal Gas Constant.  $T$  = Temperature in Kelvin, and  $K$  = equilibrium constant (concentration of  $[Rmim]Cl$  upper / concentration of  $[Rmim]Cl$  lower {all  $\text{mol l}^{-1}$ }). From top to bottom, the lines represent  $[C_5mim]Cl$  -  $\diamond$ ;  $[s-C_4mim]Cl$  -  $+$ ;  $[C_4mim]Cl$  -  $*$ ;  $[C_3mim]Cl$  -  $\times$ ;  $[C_2mim]Cl$  -  $\Delta$ ; and  $[C_1mim]Cl$  -  $\square$ .

**Table 1.** The enthalpy and entropy of dissolving 1-alkyl-3-methylimidazolium chlorides in the  $[P_{66614}]Cl$  rich phase. The data is derived from the equations of the lines in Figure 2 of the form  $y = mx + c$ . Gradient ( $m$ ) =  $-\Delta H / R$  and intercept ( $c$ ) =  $\Delta S / R$ .

| Alkyl Group | $\Delta H / \text{K J mol}^{-1}$ | $\Delta S / \text{J K}^{-1}\text{mol}^{-1}$ |
|-------------|----------------------------------|---------------------------------------------|
| C1          | -21.7                            | -100.3                                      |
| C2          | -2.29                            | -39.1                                       |
| C3          | 1.03                             | -25.5                                       |
| s-C4        | -1.14                            | -26.7                                       |
| C4          | 1.35                             | -20.3                                       |
| C5          | 1.51                             | -15.7                                       |
